# Supplementary material
Source: Springer Nature journal article supplement (https://www.springermedizin.de/resource/supplementary/12957_2012_1186_MOESM3_ESM.pdf/9561874)

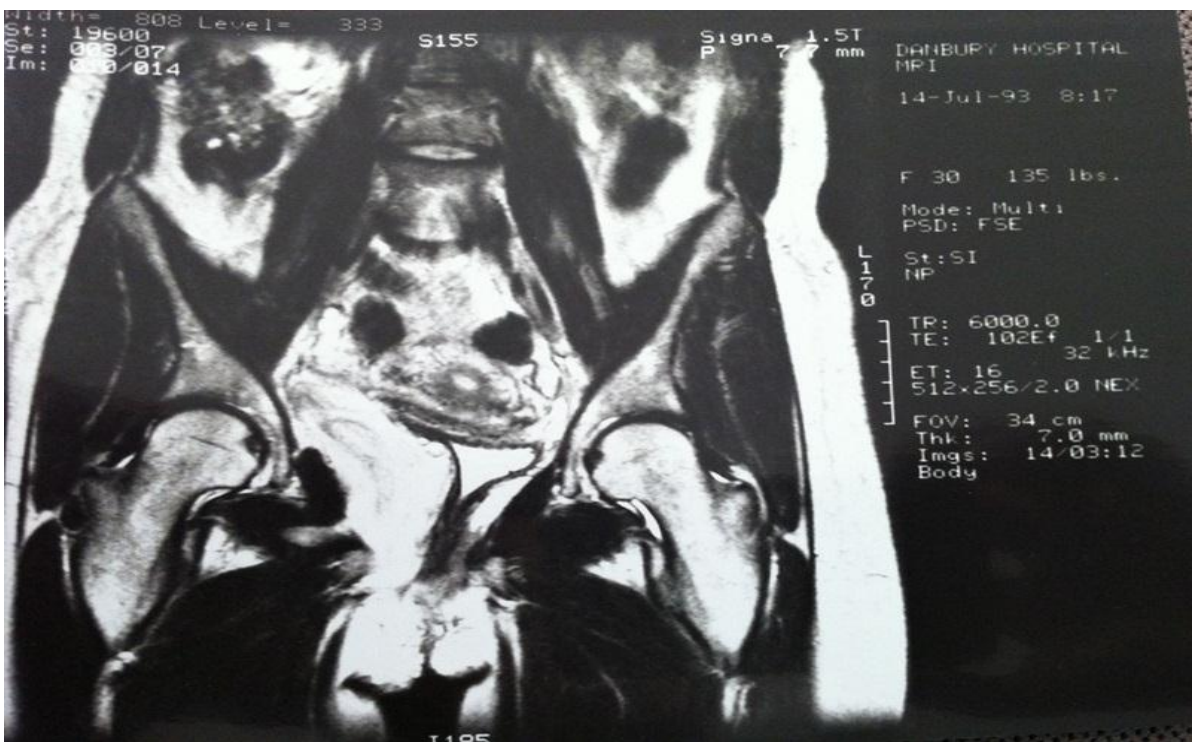

**B**

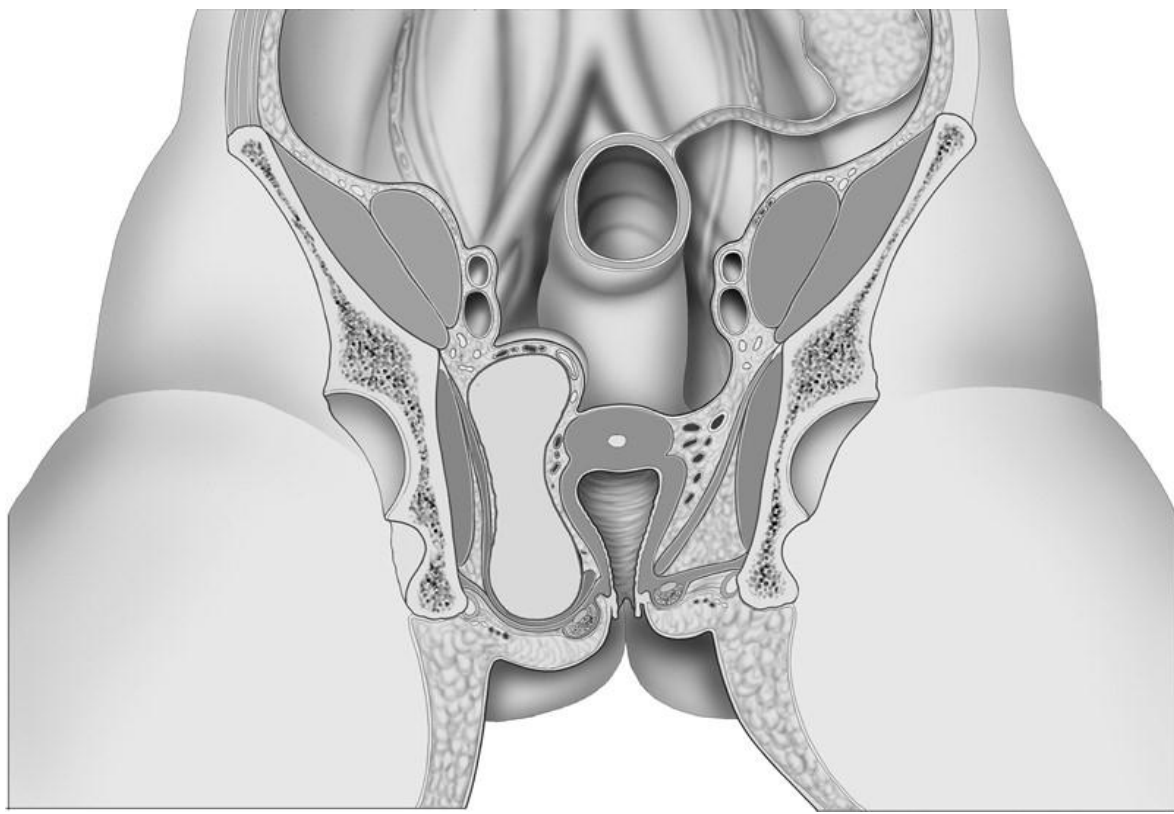

Supplement: MOESM3 [file 9561874]
